# Supplementary material for: Identification of Cisplatin-Regulated Metabolic Pathways in Pluripotent Stem Cells
Source: PubMed Central journal article supplement (PMC3797786; doi:10.1371/journal.pone.0076476), 2013-10-16

A

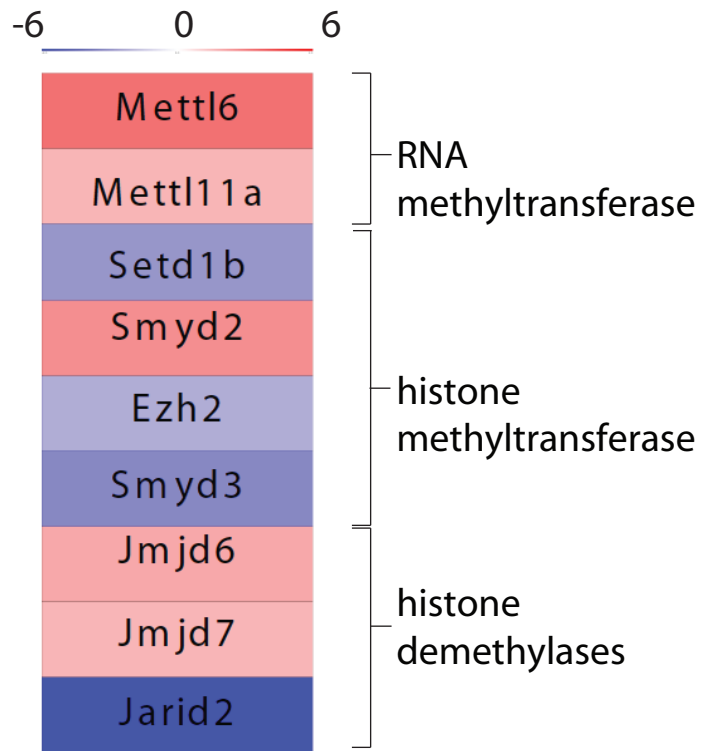

B

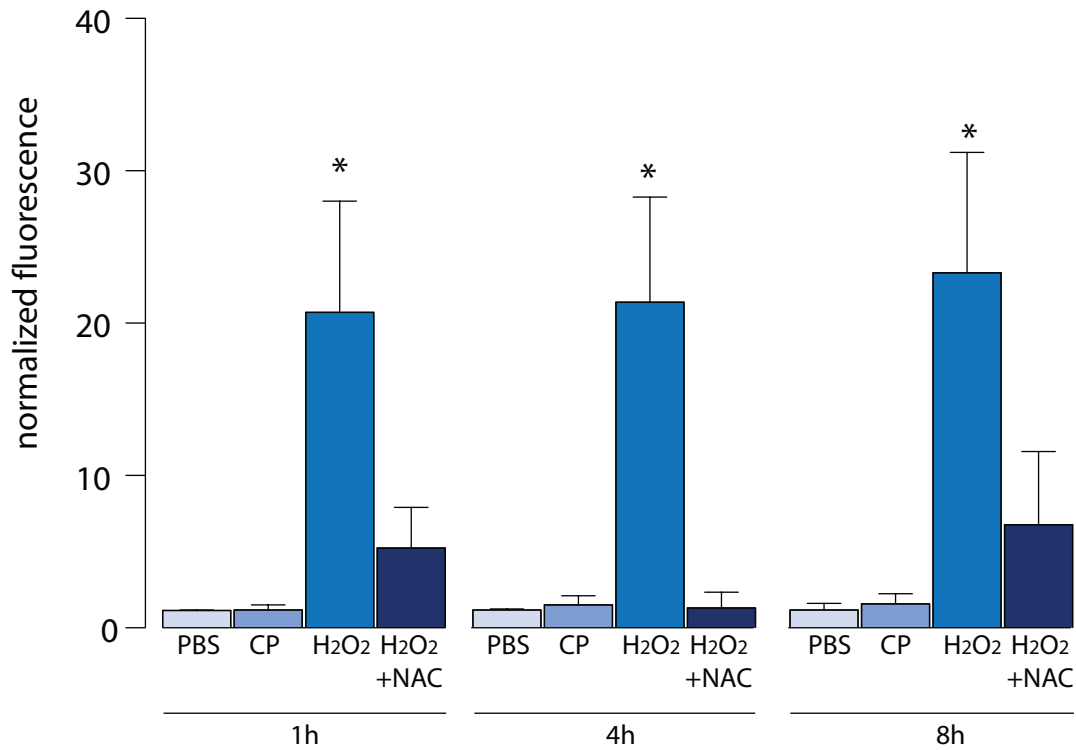

Supplement: pone.0076476.s005.pdf [file pone.0076476.s005.pdf]
