# Supplementary material for: Identification of Cisplatin-Regulated Metabolic Pathways in Pluripotent Stem Cells
Source: PubMed Central journal article supplement (PMC3797786; doi:10.1371/journal.pone.0076476), 2013-10-16
Supplement: pone.0076476.s008.pdf [file pone.0076476.s008.pdf]

***Orbitrap Mass Spectrometer settings***

**Heated electrospray interface (HESI):** operating in positive mode (ESI<sup>+</sup>).

**Data acquisition:** between m/z 100 and m/z 1000

**Resolving power:** 50.000 (FWHM)

**Scan time:** 0.5 s

**Spray voltage:** 2800 V

**Capillary voltage:** 47.5 V

**Capillary temperature:** 250 °C

**Sheath gas flow:** 19 arbitrary units

**Auxiliary gas flow:** 7 arbitrary units

**Instrument calibration:** externally, prior to sequence by infusion of calibration solution (m/z 138 to m/z 1822) containing caffeine, MFRA (Met-Arg-Phe-Ala), ultramark 1621, acetic acid in acetonitrile/methanol/water (2:1:1, v/v) (Sigma-Aldrich).
